# Supplementary material for: In Vitro Synergy of Colistin in Combination with Meropenem or Tigecycline against Carbapenem-Resistant Acinetobacter baumannii
Source: MDPI journal article supplement (doi:10.3390/antibiotics10070880), 2021-07-20
Supplement: s1 [file s1]

Supplemental

Article

# In vitro Synergy of Colistin in Combination with Meropenem or Tigecycline against Carbapenem-Resistant *Acinetobacter baumannii*

Jacinda C. Abdul-Mutakabbir <sup>1,†</sup>, Juwon Yim <sup>1,‡</sup>, Logan Nguyen <sup>1</sup>, Philip T. Maassen <sup>1</sup>, Kyle Stamper <sup>1</sup>, Zain Shiekh <sup>1</sup>, Razieh Kebriaei <sup>1</sup>, Ryan K. Shields <sup>2</sup>, Mariana Castanheira <sup>3</sup>, Keith S. Kaye <sup>4</sup> and Michael J. Rybak <sup>1,5,6,\*</sup>

**Table S1.** All 50 included isolates plus geographical area.

| ARL Isolate # | Source                | Geographical Region                  | Specimen Collection Date | Organism                       | MEM MIC | COL MIC | TKA Synergy Yes or No? |
|---------------|-----------------------|--------------------------------------|--------------------------|--------------------------------|---------|---------|------------------------|
| 9008          | Blood                 | DMC, United States                   | 5/22/14                  | <i>Acinetobacter baumannii</i> | 64      | 32      | yes                    |
| 9149          | Sputum                | DMC, United States                   | 1/8/15                   | <i>Acinetobacter baumannii</i> | 64      | 1       | yes                    |
| 9150          | Blood                 | DMC, United States                   | 2/3/15                   | <i>Acinetobacter baumannii</i> | 32      | 1       | yes                    |
| 9223          | Blood                 | DMC, United States                   | 4/30/15                  | <i>Acinetobacter baumannii</i> | 32      | 0.5     | yes                    |
| 9230          | Sputum                | DMC, United States                   | 4/28/15                  | <i>Acinetobacter baumannii</i> | 32      | 0.5     | yes                    |
| 9235          | Blood                 | DMC, United States                   | 4/19/15                  | <i>Acinetobacter baumannii</i> | 32      | 1       | yes                    |
| 9314          | Endotracheal Aspirate | Beaumont Hospital, United States     | 8/13/14                  | <i>Acinetobacter baumannii</i> | 64      | 4       | no                     |
| 8407          | Sputum                | Beaumont Hospital, United States     | 9/12/14                  | <i>Acinetobacter baumannii</i> | 64      | 4       | yes                    |
| 8410          | Tracheal Aspirate     | Beaumont Hospital, United States     | 1/31/15                  | <i>Acinetobacter baumannii</i> | 32      | 4       | yes                    |
| 8406          | Blood                 | DMC, United States                   | 6/25/15                  | <i>Acinetobacter baumannii</i> | 32      | 4       | yes                    |
| 9317          | Respiratory           | DMC, United States                   | 8/7/15                   | <i>Acinetobacter baumannii</i> | 32      | 2       | yes                    |
| 9573          | Sputum                | DMC, United States                   | 9/25/15                  | <i>Acinetobacter baumannii</i> | 64      | 0.5     | yes                    |
| 10141         | Respiratory           | DMC, United States                   | 6/7/15                   | <i>Acinetobacter baumannii</i> | 32      | 4       | yes                    |
| 11251         | Sputum                | DMC, United States                   | 10/18/15                 | <i>Acinetobacter baumannii</i> | 32      | 8       | yes                    |
| 9747          | Sputum                | Assaf Harofeh Medical Center, Israel | 2/1/15                   | <i>Acinetobacter baumannii</i> | 8       | 1       | yes                    |

|       |        |                                            |         |                                    |     |   |     |
|-------|--------|--------------------------------------------|---------|------------------------------------|-----|---|-----|
| 9748  | Sputum | Assaf Harofeh<br>Medical Center,<br>Israel | 3/6/15  | <i>Acinetobacter<br/>baumannii</i> | 8   | 4 | yes |
| 9749  | Sputum | Assaf Harofeh<br>Medical Center,<br>Israel | 4/1/15  | <i>Acinetobacter<br/>baumannii</i> | 8   | 8 | yes |
| 9751  | Sputum | Assaf Harofeh<br>Medical Center,<br>Israel | 5/21/15 | <i>Acinetobacter<br/>baumannii</i> | 16  | 2 | no  |
| 10083 | Sputum | Assaf Harofeh<br>Medical Center,<br>Israel | 6/3/15  | <i>Acinetobacter<br/>baumannii</i> | 32  | 2 | yes |
| 9756  | Sputum | Assaf Harofeh<br>Medical Center,<br>Israel | 6/7/15  | <i>Acinetobacter<br/>baumannii</i> | 8   | 4 | yes |
| 9760  | Sputum | Assaf Harofeh<br>Medical Center,<br>Israel | 6/29/15 | <i>Acinetobacter<br/>baumannii</i> | 8   | 4 | yes |
| 9761  | Sputum | Assaf Harofeh<br>Medical Center,<br>Israel | 4/27/15 | <i>Acinetobacter<br/>baumannii</i> | 16  | 1 | no  |
| 9767  | Sputum | Assaf Harofeh<br>Medical Center,<br>Israel | 7/8/15  | <i>Acinetobacter<br/>baumannii</i> | 8   | 8 | yes |
| 11247 | Sputum | Assaf Harofeh<br>Medical Center,<br>Israel | 7/11/15 | <i>Acinetobacter<br/>baumannii</i> | 8   | 8 | yes |
| 9781  | Sputum | Assaf Harofeh<br>Medical Center,<br>Israel | 8/1/15  | <i>Acinetobacter<br/>baumannii</i> | 8   | 1 | yes |
| 9784  | Sputum | Assaf Harofeh<br>Medical Center,<br>Israel | 8/7/15  | <i>Acinetobacter<br/>baumannii</i> | 8   | 1 | yes |
| 11364 | Sputum | Assaf Harofeh<br>Medical Center,<br>Israel | 8/23/15 | <i>Acinetobacter<br/>baumannii</i> | 16  | 8 | yes |
| 9799  | Sputum | Assaf Harofeh<br>Medical Center,<br>Israel | 8/31/15 | <i>Acinetobacter<br/>baumannii</i> | 32  | 2 | yes |
| 9802  | Sputum | Assaf Harofeh<br>Medical Center,<br>Israel | 9/7/15  | <i>Acinetobacter<br/>baumannii</i> | 32  | 2 | yes |
| 9903  | Sputum | DMC, United<br>States                      | 1/24/16 | <i>Acinetobacter<br/>baumannii</i> | >64 | 1 | yes |
| 9910  | Tissue | DMC, United<br>States                      | 1/15/16 | <i>Acinetobacter<br/>baumannii</i> | 64  | 2 | yes |
| 9645  | Sputum | Siriraj Hospital,<br>Bangkok,<br>Thailand  | 4/30/16 | <i>Acinetobacter<br/>baumannii</i> | >64 | 8 | yes |
| 10409 | Blood  | Siriraj Hospital,<br>Bangkok,<br>Thailand  | 5/16/16 | <i>Acinetobacter<br/>baumannii</i> | >64 | 4 | yes |

|       |        |                                            |          |                                    |     |     |     |
|-------|--------|--------------------------------------------|----------|------------------------------------|-----|-----|-----|
| 10038 | Sputum | Siriraj Hospital,<br>Bangkok,<br>Thailand  | 2/14/16  | <i>Acinetobacter<br/>baumannii</i> | >64 | 1   | yes |
| 10042 | Blood  | Siriraj Hospital,<br>Bangkok,<br>Thailand  | 2/10/16  | <i>Acinetobacter<br/>baumannii</i> | >64 | 2   | yes |
| 9656  | Blood  | Siriraj Hospital,<br>Bangkok,<br>Thailand  | 3/16/16  | <i>Acinetobacter<br/>baumannii</i> | >64 | 8   | yes |
| 10391 | Blood  | Siriraj Hospital,<br>Bangkok,<br>Thailand  | 3/18/16  | <i>Acinetobacter<br/>baumannii</i> | >64 | 8   | yes |
| 10054 | Sputum | DMC, United<br>States                      | 5/17/16  | <i>Acinetobacter<br/>baumannii</i> | >64 | 4   | yes |
| 10404 | Sputum | DMC, United<br>States                      | 4/14/16  | <i>Acinetobacter<br/>baumannii</i> | >64 | 256 | yes |
| 10062 | Sputum | Siriraj Hospital,<br>Bangkok,<br>Thailand  | 1/21/16  | <i>Acinetobacter<br/>baumannii</i> | 32  | 16  | yes |
| 10066 | Blood  | Siriraj Hospital,<br>Bangkok,<br>Thailand  | 1/30/16  | <i>Acinetobacter<br/>baumannii</i> | 32  | 4   | yes |
| 10071 | Blood  | Siriraj Hospital,<br>Bangkok,<br>Thailand  | 2/5/16   | <i>Acinetobacter<br/>baumannii</i> | 64  | 16  | yes |
| 10074 | Blood  | Siriraj Hospital,<br>Bangkok,<br>Thailand  | 11/14/15 | <i>Acinetobacter<br/>baumannii</i> | 64  | 16  | yes |
| 10075 | Sputum | Siriraj Hospital,<br>Bangkok,<br>Thailand  | 11/27/15 | <i>Acinetobacter<br/>baumannii</i> | 64  | 1   | yes |
| 10391 | Sputum | Assaf Harofeh<br>Medical Center,<br>Israel | 2/14/16  | <i>Acinetobacter<br/>baumannii</i> | 16  | 32  | yes |
| 10401 | Sputum | Assaf Harofeh<br>Medical Center,<br>Israel | 2/8/16   | <i>Acinetobacter<br/>baumannii</i> | 32  | 8   | yes |
| 10910 | Sputum | Siriraj Hospital,<br>Bangkok,<br>Thailand  | 9/18/17  | <i>Acinetobacter<br/>baumannii</i> | 64  | 8   | yes |
| 10094 | Sputum | Siriraj Hospital,<br>Bangkok,<br>Thailand  | 9/14/15  | <i>Acinetobacter<br/>baumannii</i> | >64 | 4   | yes |
| 11367 | Sputum | Assaf Harofeh<br>Medical Center,<br>Israel | 3/18/18  | <i>Acinetobacter<br/>baumannii</i> | 16  | 0.5 | no  |
| 11542 | Sputum | Siriraj Hospital,<br>Bangkok,<br>Thailand  | 2/4/19   | <i>Acinetobacter<br/>baumannii</i> | 16  | 0.5 | no  |
